# Supplementary material for: Effects of stumping on fine root architecture, growth, and physiology of Hippophae rhamnoides
Source: PeerJ journal article supplement (doi:10.7717/peerj.14978), 2023-03-09
Supplement: file.zip [file file.zip]

## Sheet: Date about figure 4 to 6
PRIMARY	CLASS	TRL	TRSA	TRPV	TRV	TRDW	TRN	RAD	RLD	RVD	TND	Pro	Root activity	Soluble sugar	malondialdehyde
C1	C	7701.18	292.13	386.449	282.77	58.5007	1555.79	1209.4	1925.3	7069.4	388.904	10.9696	53.0085	3.03052	3.78805
C2	C	7862.18	297.988	310.851	288.699	59.721	1690.79	1480.88	1965.55	7217.7	422.641	9.33116	57.4903	2.88693	3.46972
C3	C	5546.61	236.673	303.759	210.56	42.1349	1060.54	865.473	1386.66	5264.05	265.012	14.1144	48.6609	3.31772	4.39021
C4	C	3386.34	144.393	207.085	128.544	25.7116	1048.51	648.284	846.585	3213.82	261.997	17.8035	38.8632	3.60205	5.0242
C5	C	2522.09	107.526	142.297	95.7402	19.1509	474.973	426.304	630.527	2393.62	118.724	19.2719	33.3377	4.19881	5.48047
C6	C	6937.35	263.346	348.42	253.886	51.0787	1401.49	1137.66	1734.34	6347.31	350.286	12.3065	55.5345	3.39097	3.35837
C7	C	8433.39	320.124	420.401	309.673	55.8448	1813.63	1337.32	2108.35	7741.83	453.363	10.4684	60.2299	3.23031	3.07615
C8	C	4686.31	200.266	257.015	177.9	41.4314	877.588	765.134	1171.58	4447.57	219.36	15.8346	50.9798	3.71233	3.89222
C9	C	3370.42	143.876	204.803	127.941	34.598	632.348	562.533	842.604	3198.71	158.06	19.9733	40.7151	4.03049	4.4543
C10	C	2352.56	100.42	134.803	89.3087	31.2817	461.289	390.378	588.143	2232.72	115.279	21.6206	34.9263	4.69823	4.85881
C11	C	6362.59	238.209	317.009	233.342	45.0635	1285.37	1295.54	1590.65	5833.57	321.287	9.98371	57.7598	3.20407	3.56359
C12	C	9323.79	353.603	533.828	340.955	54.6102	2005.12	1768.29	2330.95	8523.97	501.168	8.49251	62.6433	3.05226	3.26413
C13	C	3252.78	130.97	163.027	113.857	36.1628	640.405	894.051	813.196	2846.65	160.069	12.8458	53.0225	3.50772	4.13007
C14	C	3344.63	137.1	193.892	123.418	43.9724	228.666	734.373	836.159	3085.79	57.1369	16.2034	42.3466	3.80834	4.72649
C15	C	1688.81	71.7513	90.5289	63.8842	37.3687	299.802	469.372	422.205	1597.18	74.9383	17.5398	36.3258	4.43927	5.15572
CK1	CK	4315.07	160.8	185.297	158.437	32.7754	857.866	784.23	1078.77	3961.34	214.451	21.4245	30.6378	6.60421	8.48123
CK2	CK	4376.96	165.815	142.56	160.715	33.2344	974.825	989.284	1094.24	4017.92	243.691	17.7291	34.7668	6.16119	7.30805
CK3	CK	3032.27	129.113	110.022	115.088	23.0346	574.294	545.216	758.068	2877.57	143.562	26.0001	27.0403	6.95223	9.52633
CK4	CK	1765.05	74.9857	63.9189	67.2678	13.3958	336.841	353.507	441.261	1682.02	84.1995	27.5054	22.2139	7.30175	10.7098
CK5	CK	999.276	42.5502	37.5693	38.0623	7.58187	188.899	178.548	249.819	951.873	47.2082	29.0922	19.61	7.42292	11.8496
CK6	CK	4033.74	152.64	133.278	148.067	44.8962	801.936	724.214	1008.43	3702.04	200.477	22.982	34.782	6.81276	8.08263
CK7	CK	4823.61	183.104	138.293	176.338	45.2022	1074.3	916.581	1205.9	4408.67	268.561	19.0179	39.4694	6.35576	6.96459
CK8	CK	2350.77	100.689	81.7856	85.9505	34.1864	537.8	528.13	587.692	2148.78	134.434	27.8902	30.6979	7.17177	9.07862
CK9	CK	1423.71	60.7739	49.3331	54.0421	20.3826	271.7	286.052	355.927	1351.28	67.9138	29.505	25.2186	7.53233	10.2064
CK10	CK	805.514	34.3734	27.9305	30.5655	16.2687	152.271	193.205	201.378	764.245	38.0623	31.2072	22.2626	7.65733	11.2927
CK11	CK	3313.63	121.089	181.166	122.5	52.6481	658.776	899.682	828.41	3062.61	164.693	20.1838	32.8254	6.41723	8.26864
CK12	CK	5516.62	199.254	355.039	205.543	59.9579	1228.65	1044.45	1379.16	5138.65	307.015	16.7023	37.2492	5.98675	7.12487
CK13	CK	1821.5	72.2827	161.65	67.2848	48.0581	278.744	562.172	455.375	1682.46	69.6818	24.4944	28.9711	6.7554	9.28755
CK14	CK	1391.19	60.1279	102.253	49.9621	32.1124	265.495	352.95	347.798	1249.2	66.3668	25.9126	23.8	7.09502	10.4413
CK15	CK	535.1	21.9976	38.3683	18.8357	23.4086	101.153	210.201	133.775	470.917	25.2785	27.4075	21.0102	7.21276	11.5526
